# Supplementary material for: Somatostatin Derivative (smsDX) Targets Cellular Metabolism in Prostate Cancer Cells after Androgen Deprivation Therapy
Source: PLOS journal article supplement (doi:10.1371/journal.pone.0055790), 2013-02-07
Supplement: S1 (10.1371/journal.pone.0055790.s001) [file journal.pone.0055790.s001]

## Sheet: Sheet1
Table S1. 56 lower expressed proteins in LNCaP-s compared to LNCaP cells (up to 1.2-fold change)
Protein ID	Protein Name	Gene Name	UniProt ID	Function Description
Carbohydrate Metabolism
642	Alpha enolase	ENO1	P06733	Carbohydrate degradation; glycolysis
928	Esterase D/formylglutathione hydrolase	ESD	Q9BVJ2	Carboxylesterase activity
997	Triosephosphate isomerase	TPI1	P60174	Carbohydrate biosynthesis,gluconeogenesis
Energy Metabolism
322	78 kDa glucose-regulated protein	GRP78	P11021	ER-associated protein catabolic process
432	60 kDa heat shock protein	HSPD1	P10809	ATP binding, ATPase activity
698	Actin, cytoplasmic 1	ACTB	P60709	ATP binding, structural constituent of cytoskeleton
1062	Adenine phosphoribosyltransferase	APRT	P07741	Purine metabolism; AMP biosynthesis
574	ATP synthase beta chain	ATP5B	P06576	Mitochondrial ATP synthesis coupled proton transport
687	Creatine kinase, B chain	CKB	P12277	ATP binding, creatine kinase activity
745	Creatine kinase, u-type	CKMT	P12532	ATP binding, creatine kinase activity
1038	DJ-1 protein	PARK7	Q99497	Stress response, hydrogen peroxide metabolic process
942	Electron transfer flavoprotein alpha-subunit	ETFA	P13804	Mitochondrion,mitochondrial respiratory chain
994	Electron transfer flavoprotein beta-subunit	ETFB	P38117	Mitochondrion,mitochondrial respiratory chain
822	Gastric-associated differentially-expressed protein YA61P	YA61	Q9NZ23	Oxidoreductase activity
1003	Heat-shock protein beta-1	HSPB1	P04792	Involved in stress resistance and actin organization
628	Mitochondrial processing peptidase beta subunit	PMPCB	O75439	Mitochondrion,cellular protein metabolic process
1049	Peroxiredoxin 2	PRDX2	P32119	hydrogen peroxide catabolic process
795	Probable mitochondrial import receptor subunit TOM40 homolog	TOMM40	O96008	Mitochondrion,Channel-forming protein into mitochondria
988	Ran-specific GTPase-activating protein	RANBP1	P43487	intracellular transport, GTPase activator activity
1011	Rho GDP-dissociation inhibitor 1	ARHGDIA	P52565	Regulates the GDP/GTP exchange reaction
325	Stress-70 protein	HSPA9	P38646	Cellular protein metabolic process, ATP binding
1071	Superoxide dismutase 1, soluble	SOD1	P00441	Antioxidant, Oxidoreductase
874	Tubulin beta-1 chain	TUBB	P07437	GTP-binding,GTPase activity
874	Tubulin beta-2 chain	TB2	P05217	GTP-binding,GTPase activity
1018	Ubiquinol-cytochrome c reductase iron-sulfur subunit	UQCC	P47985	Mitochondrion,Respiratory chain
929	Voltage-dependent anion-selective channel protein 2	VDAC2	P45880	Mitochondrion,Ion transport
Lipid Metabolism
773	Acetyl-CoA acetyltransferase, cytosolic	ACAT2	Q9BWD1	Lipid metabolic process
716	Acyl-CoA dehydrogenase, medium-chain specific	ACADM	P11310	Fatty acid metabolism
927	Delta3,5-delta2,4-dienoyl-CoA isomerase	ECH1	Q13011	Lipid metabolism; fatty acid beta-oxidation.
1005	Peroxiredoxin 6	PRDX6	P30041	Regulation of phospholipid,Lipid degradation
453	Protein disulfide-isomerase	PDIA1	P07237	Lipid metabolic process, ER protein
480	Protein disulfide-isomerase A3	PDIA3	P30101	Llipid metabolic process, ER protein
Nucleotide Metabolism
1063	Chromobox protein homolog 3	CBX3	Q13185	Transcription regulation,DNA-dependent
1077	Eukaryotic initiation factor 5A	EIF5A	P63241	Ttranslation elongation factor activity
322	Far upstream element binding protein 1	FUBP1	Q96AE4	RNA, DNA binding
685	Heterogeneous nuclear ribonucleoprotein D0	HNRNPD	Q14103	Transcription regulation, Nucleotide binding
552	Heterogeneous nuclear ribonucleoprotein H	HNRNPH1	P31943	Transcription regulation,Nucleotide binding
431	Heterogeneous nuclear ribonucleoprotein K	HNRNPK	P61978	Transcription regulation,Nucleotide binding
420	Heterogeneous nuclear ribonucleoprotein L	HNRNPL	P14866	Transcription regulation,Nucleotide binding
808	Heterogeneous nuclear ribonucleoproteins C1/C2	HNRNPC	P07910	Transcription regulation, Nucleotide binding
319	Heat shock cognate 71 kDa protein	HSPA8	P11142	Stress response,Transcription regulation
1065	Nucleoside diphosphate kinase A	NME1	P15531	Synthesis of nucleoside triphosphates and ATP
389	Paraspeckle protein 1	PSPC1	Q8WXF1	Transcription regulation,nucleotide binding
904	Phosphoribosyl pyrophosphate synthetase 1	PRPS1	P60891	Nucleotide biosynthesis
908	Splicing factor, arginine/serine-rich 1	SRSF1	Q07955	Transcription regulation, RNA binding
1006	Splicing factor, arginine/serine-rich 9	SRSF9	Q13242	Transcription regulation,RNA binding
Amino Acid Metabolism
508	D-3-phosphoglycerate dehydrogenase	PHGDH	O43175	Amino-acid biosynthesis
557	Glutamate dehydrogenase 1	GLUD1	P00367	Mitochondrion, glutamate biosynthetic process
891	Inorganic pyrophosphatase	PPA1	Q15181	Diphosphate metabolic process
Other functions
1027	Catechol O-methyltransferase, membrane-bound form	COMT	P21964	Neurotransmitter degradation
983	Endoplasmic reticulum protein 29	ERP29	P30040	Endoplasmic reticulum protein
1066	Eukaryotic translation initiation factor 1A, Y-chromosomal	EIF1AY	O14602	Protein biosynthesis,translation initiation factor activity
790	Keratin, type II cytoskeletal 8	KRT8	P05787	Cytoskeleton organization
992	Proteasome subunit alpha type 5	PSMA5	P28066	DNA damage response, P53
1073	Stathmin	STMN1	P16949	Signal transducer activity
1044	Translationally controlled tumor protein	TPT1	P13693	Anti-apoptosis,calcium ion transport
